# Supplementary material
Source: PubMed Central journal article supplement (PMC1458674)

Breast Cancer (10)

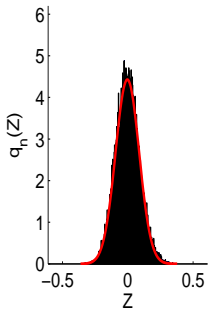

Breast Cancer (11)

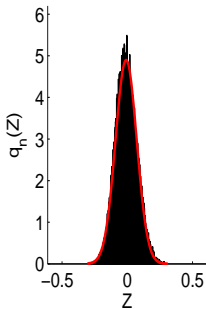

Acute Lymphocitic Leukemia (5)

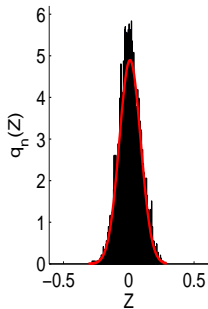

Hepatocellular Carcinoma (25)

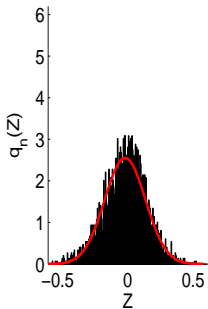

Lung Cancer (7)

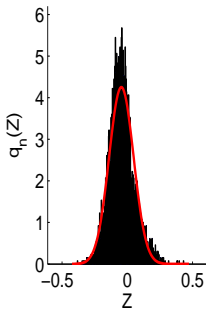

Lung Cancer (3)

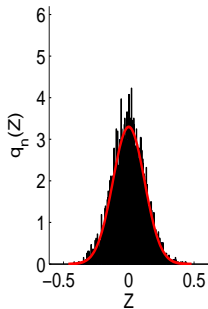

Supplement: pnas_0601231103_3.pdf [file pnas_0601231103_3.pdf]
