# Supplementary material
Source: PubMed Central journal article supplement (PMC1458674)

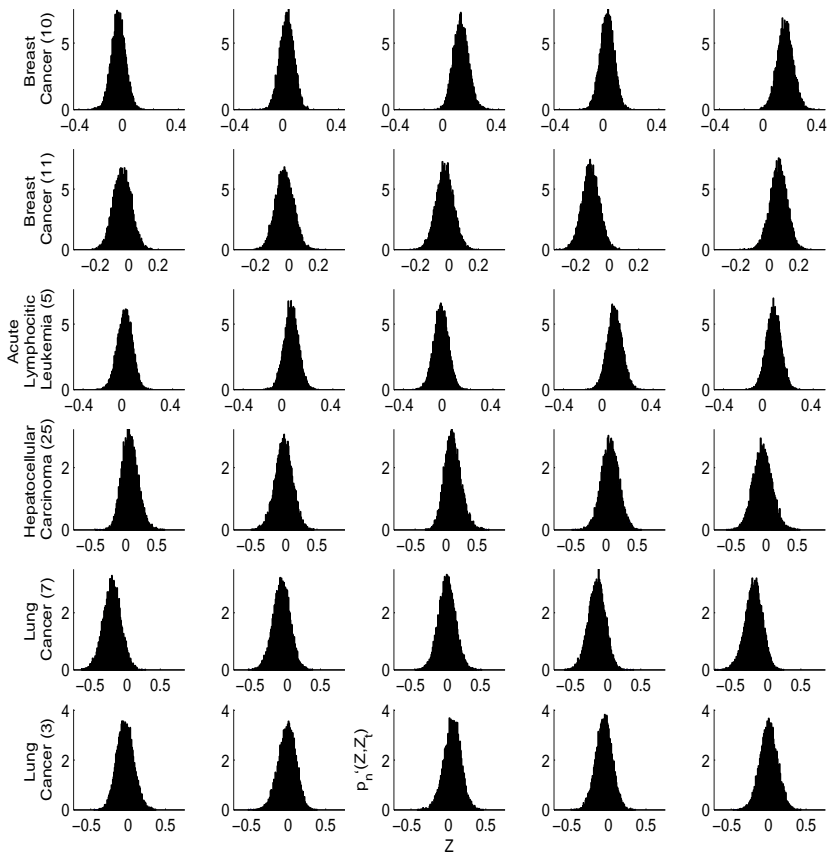

Supplement: pnas_0601231103_1.pdf [file pnas_0601231103_1.pdf]
